# Supplementary material for: Poles Apart: Arctic and Antarctic Octadecabacter strains Share High Genome Plasticity and a New Type of Xanthorhodopsin
Source: PubMed Central journal article supplement (PMC3646047; doi:10.1371/journal.pone.0063422), 2013-05-06
Supplement: pone.0063422.s009.pdf [file pone.0063422.s009.pdf]

**Table S1. Rhodopsin sequences used for phylogenetic and metagenomic analyses.**

| <b>NCBI-Acc:</b> | <b>Organism</b>                | <b>Strain/clone</b> | <b>Group</b>    | <b>Blast-query</b> |
|------------------|--------------------------------|---------------------|-----------------|--------------------|
| ZP_01049273      | <i>Dokdonia donghaensis</i>    | MED134              | Proteorhodopsin |                    |
| ACM89772         | <i>Dokdonia donghaensis</i>    | PRO95               | Proteorhodopsin | x                  |
| YP_002885111     | <i>Exiguobacterium sp.</i>     | AT1b                | Proteorhodopsin | x                  |
| AAK30187         | uncultured bacterium           | MB 40m5             | Proteorhodopsin |                    |
| ZP_05069347      | <i>Candidatus Pelagibacter</i> | HTCC7211            | Proteorhodopsin |                    |
| AAR05251         | uncultured marine bacterium    | fosmid ANT32C12     | Proteorhodopsin |                    |
| AAG10475         | uncultured marine bacterium    | BAC EBAC31A08       | Proteorhodopsin |                    |
| AAK30177         | uncultured bacterium           | HOT 75m1            | Proteorhodopsin |                    |
| AAK30200         | uncultured bacterium           | PalE6               | Proteorhodopsin |                    |
| EAQ40925         | <i>Polaribacter sp.</i>        | MED152              | Proteorhodopsin |                    |
| ZP_01161099      | <i>Photobacterium sp.</i>      | SKA34               | Proteorhodopsin |                    |
| ZP_02194911      | <i>Vibrio sp.</i>              | AND4                | Proteorhodopsin |                    |
| ABR27802         | <i>Candidatus Pelagibacter</i> | HTCC1062            | Proteorhodopsin |                    |
| ABO88140         | <i>Gammaproteobacterium</i>    | HTCC2207            | Proteorhodopsin |                    |
| ZP_01236264      | <i>Photobacterium angustum</i> | S14                 | Proteorhodopsin | x                  |
| AAK30174         | uncultured bacterium           | BAC EBAC40E8        | Proteorhodopsin |                    |
| AAK30175         | uncultured bacterium           | BAC EBAC64A5        | Proteorhodopsin |                    |
| AAK30176         | uncultured bacterium           | HOT 0m1             | Proteorhodopsin |                    |
| AAK30178         | uncultured bacterium           | HOT 75m3            | Proteorhodopsin |                    |
| AAK30180         | uncultured bacterium           | HOT 75m8            | Proteorhodopsin |                    |
| AAK30181         | uncultured bacterium           | MB 0m1              | Proteorhodopsin |                    |
| AAK30182         | uncultured bacterium           | MB 0m2              | Proteorhodopsin |                    |
| AAK30184         | uncultured bacterium           | MB 20m5             | Proteorhodopsin |                    |
| AAK30185         | uncultured bacterium           | MB 20m12            | Proteorhodopsin |                    |
| AAK30186         | uncultured bacterium           | MB 40m1             | Proteorhodopsin |                    |
| AAK30188         | uncultured bacterium           | MB 40m12            | Proteorhodopsin |                    |
| AAK30189         | uncultured bacterium           | MB 100m5            | Proteorhodopsin | x                  |
| AAK30190         | uncultured bacterium           | MB 100m7            | Proteorhodopsin |                    |
| AAK30191         | uncultured bacterium           | MB 100m9            | Proteorhodopsin |                    |
| AAK30192         | uncultured bacterium           | MB 100m10           | Proteorhodopsin |                    |
| AAK30193         | uncultured bacterium           | PalB1               | Proteorhodopsin |                    |
| AAK30194         | uncultured bacterium           | PalB2               | Proteorhodopsin |                    |
| AAK30195         | uncultured bacterium           | PalB5               | Proteorhodopsin |                    |
| AAK30196         | uncultured bacterium           | PalB6               | Proteorhodopsin |                    |
| AAK30197         | uncultured bacterium           | PalB7               | Proteorhodopsin |                    |
| AAK30198         | uncultured bacterium           | PalB8               | Proteorhodopsin |                    |
| AAK30199         | uncultured bacterium           | PalE1               | Proteorhodopsin |                    |
| AAK30201         | uncultured bacterium           | PalE7               | Proteorhodopsin |                    |
| AAO21434         | uncultured bacterium           | MED26               | Proteorhodopsin |                    |
| AAO21435         | uncultured bacterium           | MED27               | Proteorhodopsin |                    |
| AAO21436         | uncultured bacterium           | MED36               | Proteorhodopsin |                    |
| AAO21437         | uncultured bacterium           | MED101              | Proteorhodopsin |                    |
| AAO21438         | uncultured bacterium           | MED102              | Proteorhodopsin |                    |

|          |                             |              |                 |
|----------|-----------------------------|--------------|-----------------|
| AAO21440 | uncultured bacterium        | MED25        | Proteorhodopsin |
| AAO21441 | uncultured bacterium        | MED202       | Proteorhodopsin |
| AAO21444 | uncultured bacterium        | REDA9        | Proteorhodopsin |
| AAO21445 | uncultured bacterium        | REDB9        | Proteorhodopsin |
| AAO21446 | uncultured bacterium        | REDF9        | Proteorhodopsin |
| AAO21449 | uncultured bacterium        | RED23        | Proteorhodopsin |
| AAO21451 | uncultured bacterium        | RED30        | Proteorhodopsin |
| AAO21452 | uncultured bacterium        | RED4         | Proteorhodopsin |
| AAO21453 | uncultured bacterium        | RED5         | Proteorhodopsin |
| AAO21454 | uncultured bacterium        | REDr6a5a14   | Proteorhodopsin |
| AAO21455 | uncultured bacterium        | REDr6a5a6    | Proteorhodopsin |
| AAO73909 | uncultured bacterium        | REDS3_7      | Proteorhodopsin |
| AAO73910 | uncultured bacterium        | REDr7_1_15   | Proteorhodopsin |
| AAO73911 | uncultured bacterium        | REDS3_15     | Proteorhodopsin |
| AAO73912 | uncultured bacterium        | medA15r8ex6  | Proteorhodopsin |
| AAO73913 | uncultured bacterium        | REDr7_1_16   | Proteorhodopsin |
| AAO73914 | uncultured bacterium        | medA15r11b9  | Proteorhodopsin |
| AAO73915 | uncultured bacterium        | medA15r9b5   | Proteorhodopsin |
| AAO73916 | uncultured bacterium        | medA15r8b3   | Proteorhodopsin |
| AAO73917 | uncultured bacterium        | medA15r11b3  | Proteorhodopsin |
| AAO73918 | uncultured bacterium        | medA15_r8_1  | Proteorhodopsin |
| AAO73919 | uncultured bacterium        | medA17R9_1   | Proteorhodopsin |
| AAO73920 | uncultured bacterium        | medA15r8b9   | Proteorhodopsin |
| AAO73921 | uncultured bacterium        | medA19_R8_16 | Proteorhodopsin |
| AAO73922 | uncultured bacterium        | medA19_R8_19 | Proteorhodopsin |
| AAO73923 | uncultured bacterium        | medA17_R8_6  | Proteorhodopsin |
| AAO73924 | uncultured bacterium        | medA15r9b7   | Proteorhodopsin |
| AAO73925 | uncultured bacterium        | medA15_R8_3  | Proteorhodopsin |
| AAO73926 | uncultured bacterium        | medA15r10b5  | Proteorhodopsin |
| AAO73927 | uncultured bacterium        | medA19_r9_9  | Proteorhodopsin |
| AAO73928 | uncultured bacterium        | medA15_r8ex7 | Proteorhodopsin |
| AAO73929 | uncultured bacterium        | medA19_R8_20 | Proteorhodopsin |
| AAO73931 | uncultured bacterium        | medA15_r9_3  | Proteorhodopsin |
| AAT09899 | uncultured bacterium        | N2_R17_6     | Proteorhodopsin |
| AAT09900 | uncultured bacterium        | ANT131_R1_4  | Proteorhodopsin |
| AAT09902 | uncultured bacterium        | A15_R9EX2    | Proteorhodopsin |
| AAT09903 | uncultured bacterium        | MEDA15r9b9   | Proteorhodopsin |
| AAT12291 | uncultured bacterium        | REDr7a3a5    | Proteorhodopsin |
| AAT38634 | uncultured bacterium        | NA13_R15_2   | Proteorhodopsin |
| AAY68055 | uncultured bacterium        | MEDPR46A6    | Proteorhodopsin |
| AAY68065 | uncultured bacterium        | MEDPR66A3    | Proteorhodopsin |
| AAY82613 | uncultured bacterium        | MedeBAC35C06 | Proteorhodopsin |
| ABL97257 | uncultured marine bacterium | EB0_50A10    | Proteorhodopsin |
| ABL97415 | uncultured marine bacterium | EB80_02D08   | Proteorhodopsin |
| ABL97630 | uncultured marine bacterium | EB0_39H12    | Proteorhodopsin |
| ABL97764 | uncultured marine bacterium | EB0_41B09    | Proteorhodopsin |

|              |                                     |                 |                   |   |
|--------------|-------------------------------------|-----------------|-------------------|---|
| ABL97827     | uncultured marine bacterium         | HF10_49E08      | Proteorhodopsin   |   |
| ADI16288     | uncultured bacterium                | HF0010_16H03    | Proteorhodopsin   |   |
| Q9AFF7       | <i>Gammaproteobacterium</i>         | Hot 75m4        | Proteorhodopsin   |   |
| YP_003552453 | <i>Candidatus Puniceispirillum</i>  | IMCC1322        | Proteorhodopsin   |   |
| ZP_01447408  | <i>Rhodobacterales bacterium</i>    | HTCC2255        | Proteorhodopsin   |   |
| ZP_01616930  | <i>marine gamma</i>                 | HTCC2143        | Proteorhodopsin   |   |
| ZP_01734914  | <i>Flavobacteria bacterium</i>      | BAL38           | Proteorhodopsin   |   |
| ZP_07741624  | <i>Vibrio caribbenthicus</i>        | ATCC BAA-2122   | Proteorhodopsin   |   |
| YP_001813902 | <i>Exiguobacterium sibiricum</i>    | 255-15          | Proteorhodopsin   |   |
| ABL60988     | uncultured marine bacterium         | HF10_19P19      | Proteorhodopsin   |   |
| AAY82724     | uncultured bacterium                | MedeBAC86H08_1  | Proteorhodopsin   | x |
| ZP_01253360  | <i>Psychroflexus torquis</i>        | ATCC 700755     | Proteorhodopsin   |   |
| YP_445623    | <i>Salinibacter ruber</i>           | M31             | Subgroup I-XR     | x |
| NP_923144    | <i>Gloeobacter violaceus</i>        | PCC 7421        | Subgroup I-XR     |   |
| ACN42852     | <i>Actinobacterium sp.</i>          | MWH-EgelM2-3.D6 | Subgroup I-XR     |   |
| YP_001277280 | <i>Roseiflexus sp.</i>              | RS-1            | Subgroup I-XR     |   |
| ZP_03495873  | <i>Thermus aquaticus</i>            | Y51MC23         | Subgroup I-XR     |   |
| ACN42850     | <i>Candidatus Aquiluna</i>          | MWH-Dar4        | Subgroup I-XR     |   |
| ACN42851     | <i>Candidatus Rhodoluna</i>         | MWH-Ta8         | Subgroup I-XR     |   |
| ACN42848     | <i>Actinobacterium MWH-Uga1</i>     | MWH-Uga1        | Subgroup I-XR     |   |
| ACN42849     | <i>Candidatus Rhodoluna</i>         | MWH-Dar1        | Subgroup I-XR     | x |
| ZP_05050139  | <i>Octadecabacter antarcticus</i>   | 307             | Subgroup II-XR    |   |
| ZP_05063020  | <i>Octadecabacter arcticus</i>      | 238             | Subgroup II-XR    | x |
| AAO14677     | <i>Pyrocystis lunula</i>            |                 | Subgroup II-XR    |   |
| ZP_02189379  | <i>Nisaea sp.</i>                   | BAL199          | Subgroup II-XR    |   |
| ABV22426     | <i>Oxyrrhis marina</i>              | Om-5p-3-1       | Subgroup II-XR    |   |
| ZP_01551538  | <i>Methylophilales bacterium</i>    | HTCC2181        | Subgroup II-XR    |   |
| ZP_01737880  | <i>Marinobacter sp.</i>             | ELB17           | Subgroup II-XR    |   |
| ABV22432     | <i>Oxyrrhis marina</i>              | Om-5p-3-7       | Subgroup II-XR    |   |
| ABV22427     | <i>Oxyrrhis marina</i>              | Om-5p-3-2       | Subgroup II-XR    |   |
| ABV22430     | <i>Oxyrrhis marina</i>              | Om-5p-3-5       | Subgroup II-XR    |   |
| ZP_05081813  | <i>Betaproteobacterium</i>          | KB13            | Subgroup II-XR    | x |
| ABL97763     | uncultured marine bacterium         | EB0_41B09       | Subgroup II-XR    |   |
| ZP_08273891  | <i>Oxalobacteraceae bacterium</i>   | IMCC9480        | Subgroup II-XR    |   |
| YP_004537746 | <i>Thioalkalimicrobium cyclicum</i> | ALM1            | Subgroup II-XR    |   |
| AEF32712     | <i>Polarella glacialis</i>          | CCMP 2088       | Subgroup II-XR    |   |
| AEF32711     | <i>Polarella glacialis</i>          |                 | Subgroup II-XR    |   |
| YP_001689404 | <i>Halobacterium salinarum</i>      | R1              | Bacteriorhodopsin |   |
| YP_137573    | <i>Haloarcula marismortui</i>       | ATCC 43049      | Bacteriorhodopsin |   |
| ABT17417     | <i>Halorubrum sp.</i>               | TP009           | Bacteriorhodopsin |   |
| AAS15567     | <i>Halorubrum xinjiangense</i>      | BD-1            | Bacteriorhodopsin | x |
| Q57101       | <i>Haloarcula argentinensis</i>     | arg-1           | Bacteriorhodopsin |   |
| BAA81816     | <i>Haloarcula japonica</i>          | TR-1            | Bacteriorhodopsin |   |
| P33971       | <i>Halobacterium salinarum</i>      | Port            | Bacteriorhodopsin |   |
| YP_003177111 | <i>Halomicrobium mukohataei</i>     | DSM 12286       | Bacteriorhodopsin | x |
| YP_003129235 | <i>Halorhabdus utahensis</i>        | DSM 12940       | Bacteriorhodopsin |   |

|              |                                 |            |                   |   |
|--------------|---------------------------------|------------|-------------------|---|
| AAG42454     | <i>Halobacterium salinarum</i>  | XZ515      | Bacteriorhodopsin |   |
| ABT17372     | uncultured <i>haloarchaeon</i>  | FLAS10H9   | Bacteriorhodopsin |   |
| P29563       | <i>Halobacterium sp.</i>        | AUS-2      | Bacteriorhodopsin |   |
| P33972       | <i>Halobacterium salinarum</i>  | Shark      | Bacteriorhodopsin |   |
| P69051       | <i>Halobacterium sp.</i>        | aus-1      | Bacteriorhodopsin |   |
| P96787       | <i>Halorubrum sodomense</i>     |            | Bacteriorhodopsin |   |
| YP_656801    | <i>Haloquadratum walsbyi</i>    | DSM 16790  | Bacteriorhodopsin | x |
| AAU04564     | <i>Halobiforma lacisalsi</i>    | AJ5        | Bacteriorhodopsin |   |
| YP_136278    | <i>Haloarcula marismortui</i>   | ATCC 43049 | Halorhodopsin     |   |
| BAA07823     | <i>Halobacterium salinarum</i>  | port       | Halorhodopsin     |   |
| O93742       | <i>Halorubrum sodomense</i>     |            | Halorhodopsin     |   |
| YP_003176891 | <i>Halomicrobium mukohataei</i> | DSM 12286  | Halorhodopsin     |   |
| P33742       | <i>Halobacterium sp.</i>        | SG1        | Halorhodopsin     |   |
| YP_002565246 | <i>Halorubrum lacusprofundi</i> | ATCC 49239 | Halorhodopsin     |   |
| BAA75201     | <i>Haloterrigena sp.</i>        | arg-4      | Halorhodopsin     |   |
| NP_279315    | <i>Halobacterium sp.</i>        | NRC-1      | Halorhodopsin     | x |
| O93741       | <i>Haloterrigena sp.</i>        | arg-4      | Halorhodopsin     |   |
| P15647       | <i>Natronomonas pharaonis</i>   |            | Halorhodopsin     |   |
| P94853       | <i>Haloarcula vallismortis</i>  | J. F. 54   | Halorhodopsin     |   |
| Q48314       | <i>Halobacterium salinarum</i>  | Shark      | Halorhodopsin     |   |
| YP_003480703 | <i>Natriaiba magadii</i>        | ATCC 43099 | Halorhodopsin     | x |
| YP_325981    | <i>Natronomonas pharaonis</i>   | DSM 2160   | Halorhodopsin     |   |
| YP_446872    | <i>Salinibacter ruber</i>       | M31        | Halorhodopsin     |   |
| YP_658762    | <i>Haloquadratum walsbyi</i>    | DSM 16790  | Halorhodopsin     |   |
| Q48334       | <i>Haloarcula vallismortis</i>  | J. F. 54   | Sensory rhodopsin |   |
| AAA72316     | <i>Halobacterium salinarum</i>  | Flx5R      | Sensory rhodopsin |   |
| AAC44370     | <i>Halobacterium salinarum</i>  | Flx15      | Sensory rhodopsin |   |
| YP_331142    | <i>Natronomonas pharaonis</i>   | DSM 2160   | Sensory rhodopsin | x |
| BAB86796     | <i>Halobacterium sp.</i>        | aus-1      | Sensory rhodopsin | x |
| YP_003572671 | <i>Salinibacter ruber</i>       | M8         | Sensory rhodopsin |   |
| YP_137680    | <i>Haloarcula marismortui</i>   | ATCC 43049 | Sensory rhodopsin | x |
| YP_446677    | <i>Salinibacter ruber</i>       | M31        | Sensory rhodopsin |   |
| YP_446609    | <i>Salinibacter ruber</i>       | M31        | Sensory rhodopsin | x |
| NP_280508    | <i>Halobacterium sp.</i>        | NRC-1      | Sensory rhodopsin |   |
| YP_002564761 | <i>Halorubrum lacusprofundi</i> | ATCC 49239 | Sensory rhodopsin |   |
| XP_959421    | <i>Neurospora crassa</i>        | OR74A      | fungal rhodopsin  |   |
| CBI54495     | <i>Sordaria macrospora</i>      | k-hell     | fungal rhodopsin  |   |
| AAG01180     | <i>Leptosphaeria maculans</i>   | M1         | fungal rhodopsin  |   |
| XP_001597420 | <i>Sclerotinia sclerotiorum</i> | 1980       | fungal rhodopsin  |   |
| AAK49108     | <i>Coccidioides posadasii</i>   |            | fungal rhodopsin  |   |
| AAL27088     | <i>Coccidioides posadasii</i>   |            | fungal rhodopsin  |   |
| AAQ75384     | <i>Oryza sativa</i>             |            | fungal rhodopsin  |   |
| BAH28809     | <i>Bipolaris oryzae</i>         |            | fungal rhodopsin  |   |
| CAR82401     | <i>Gibberella fujikuroi</i>     | FKMC1995   | fungal rhodopsin  |   |
| CBF82866     | <i>Aspergillus nidulans</i>     | FGSC A4    | fungal rhodopsin  |   |
| CBX95095     | <i>Leptosphaeria maculans</i>   | v23.1.3    | fungal rhodopsin  |   |

|              |                                      |                  |                  |   |
|--------------|--------------------------------------|------------------|------------------|---|
| EEH04666     | <i>Ajellomyces capsulatus</i>        | G186AR           | fungal rhodopsin |   |
| EEH18597     | <i>Paracoccidioides brasiliensis</i> | Pb03             | fungal rhodopsin |   |
| EEH44959     | <i>Paracoccidioides brasiliensis</i> | Pb18             | fungal rhodopsin |   |
| EER40098     | <i>Ajellomyces capsulatus</i>        | H143             | fungal rhodopsin |   |
| EFQ91496     | <i>Pyrenophora teres</i>             | 0-1              | fungal rhodopsin |   |
| XP_001217277 | <i>Aspergillus terreus</i>           | NIH2624          | fungal rhodopsin |   |
| XP_001227935 | <i>Chaetomium globosum</i>           | CBS 148.51       | fungal rhodopsin |   |
| XP_001240940 | <i>Coccidioides immitis</i>          | RS               | fungal rhodopsin |   |
| XP_001262778 | <i>Neosartorya fischeri</i>          | NRRL 181         | fungal rhodopsin |   |
| XP_001272404 | <i>Aspergillus clavatus</i>          | NRRL 1           | fungal rhodopsin |   |
| XP_001395233 | <i>Aspergillus niger</i>             | CBS 513.88       | fungal rhodopsin | x |
| XP_001536854 | <i>Ajellomyces capsulatus</i>        | NAm1             | fungal rhodopsin |   |
| XP_001558822 | <i>Botryotinia fuckeliana</i>        | B05.10           | fungal rhodopsin |   |
| XP_001791479 | <i>Phaeosphaeria nodorum</i>         | SN15             | fungal rhodopsin |   |
| XP_001904282 | <i>Podospora anserina</i>            | S mat+           | fungal rhodopsin | x |
| XP_001937307 | <i>Pyrenophora tritici-repentis</i>  | Pt-1C-BFP        | fungal rhodopsin |   |
| XP_002143235 | <i>Penicillium marneffeii</i>        | ATCC 18224       | fungal rhodopsin |   |
| XP_002479531 | <i>Talaromyces stipitatus</i>        | ATCC 10500       | fungal rhodopsin |   |
| XP_002479532 | <i>Talaromyces stipitatus</i>        | ATCC 10500       | fungal rhodopsin |   |
| XP_002479534 | <i>Talaromyces stipitatus</i>        | ATCC 10500       | fungal rhodopsin |   |
| XP_002542856 | <i>Uncinocarpus reesii</i>           | 1704             | fungal rhodopsin |   |
| XP_002620840 | <i>Ajellomyces dermatitidis</i>      | SLH14081         | fungal rhodopsin |   |
| XP_002849585 | <i>Arthroderma otae</i>              | CBS 113480       | fungal rhodopsin |   |
| XP_003043878 | <i>Nectria haematococca</i>          | 77-13-4          | fungal rhodopsin |   |
| XP_003065238 | <i>Coccidioides posadasii</i>        | C735 delta SOWgp | fungal rhodopsin |   |
| XP_387730    | <i>Gibberella zeae</i>               | PH-1             | fungal rhodopsin |   |
| XP_660965    | <i>Aspergillus nidulans</i>          | FGSC A4          | fungal rhodopsin |   |
| XP_746789    | <i>Aspergillus fumigatus</i>         | Af293            | fungal rhodopsin |   |
| ZP_01440547  | <i>Fulvimarina pelagi</i>            | HTCC2506         | unclassified     |   |
| ZP_06860850  | <i>Citromicrobium bathyomarinum</i>  | JL354            | unclassified     |   |
| YP_003705905 | <i>Truepera radiovictrix</i>         | DSM 17093        | unclassified     |   |
| YP_003706581 | <i>Truepera radiovictrix</i>         | DSM 17093        | unclassified     |   |
| YP_004429763 | <i>Krokinobacter sp.</i>             | 4H-3-7-5         | unclassified     |   |
| YP_003410608 | <i>Geodermatophilus obscurus</i>     | DSM 43160        | unclassified     |   |
| YP_001361545 | <i>Kineococcus radiotolerans</i>     | SRS30216         | unclassified     |   |
| ADV90266     | <i>Thermochromatium tepidum</i>      | ATCC 43061       | unclassified     |   |

XR, xanthorhodopsin

Sequences used as query in the primary blast-analysis of metagenomes are marked by an "x" in the corresponding column.
