# Supplementary material for: Poles Apart: Arctic and Antarctic Octadecabacter strains Share High Genome Plasticity and a New Type of Xanthorhodopsin
Source: PubMed Central journal article supplement (PMC3646047; doi:10.1371/journal.pone.0063422), 2013-05-06
Supplement: pone.0063422.s010.pdf [file pone.0063422.s010.pdf]

**Table S2. Cyanophycin ligase and cyanophycin ligase-like protein sequences used for phylogenetic analyses.**

| Organism                                           | Phylum                               | Protein Acc (NCBI)   | Group        |
|----------------------------------------------------|--------------------------------------|----------------------|--------------|
| Synechocystis sp. PCC 6803                         | Cyanobacteria                        | NP_441210            | Group-I *    |
| Anabaena variabilis ATCC 29413                     | Cyanobacteria                        | YP_322331            | Group-I *    |
| Crocospaera watsonii WH 8501                       | Cyanobacteria                        | ZP_00519191          | Group-I *    |
| Gloeobacter violaceus PCC 7421                     | Cyanobacteria                        | BAC92267             | Group-I *    |
| Nostoc punctiforme PCC 73102                       | Cyanobacteria                        | YP_001869064         | Group-I *    |
| Nostoc sp. PCC 7120                                | Cyanobacteria                        | P58572               | Group-I *    |
| Synechococcus sp. MA19                             | Cyanobacteria                        | AAL56990             | Group-I *    |
| Synechococcus sp. PCC 7002                         | Cyanobacteria                        | YP_001735638         | Group-I *    |
| Geminocystis herdmanii PCC 6308                    | Cyanobacteria                        | P56947               | Group-I *    |
| Thermosynechococcus elongatus BP-1                 | Cyanobacteria                        | BAC09722             | Group-I *    |
| Trichodesmium erythraeum IMS101                    | Cyanobacteria                        | ABG51217             | Group-I *    |
| Chromohalobacter salexigens DSM 3043               | Proteobacteria (Gammaproteobacteria) | ABE58470             | Group-XI     |
| Anabaena variabilis ATCC 29413                     | Cyanobacteria                        | YP_320856            | Group-II *   |
| Nostoc punctiforme PCC 73102                       | Cyanobacteria                        | YP_001865424         | Group-II *   |
| Nostoc sp. PCC 7120                                | Cyanobacteria                        | NP_484617            | Group-II *   |
| Anabaena variabilis ATCC 29413                     | Cyanobacteria                        | YP_320778            | Group-III*   |
| Nostoc punctiforme PCC 73102                       | Cyanobacteria                        | YP_001865872         | Group-III*   |
| Nostoc sp. PCC 7120                                | Cyanobacteria                        | BAB73478             | Group-III*   |
| Bordetella avium 197N                              | Proteobacteria (Betaproteobacteria)  | YP_785755            | Group-IV *   |
| Bordetella bronchiseptica RB50                     | Proteobacteria (Betaproteobacteria)  | NP_890119            | Group-IV *   |
| Bordetella pertussis T'hama I                      | Proteobacteria (Betaproteobacteria)  | NP_880454            | Group-IV *   |
| Dechloromonas aromatica RCB                        | Proteobacteria (Betaproteobacteria)  | YP_286464            | Group-IV *   |
| Methylibium petroleiphilum PM1                     | Proteobacteria (Betaproteobacteria)  | YP_001020219         | Group-IV *   |
| Nitrosomonas europaea ATCC 19718                   | Proteobacteria (Betaproteobacteria)  | NP_840996            | Group-IV *   |
| Nitrosomonas eutropha C91                          | Proteobacteria (Betaproteobacteria)  | ABI59649             | Group-IV *   |
| Nitrospira multiformis ATCC 25196                  | Proteobacteria (Betaproteobacteria)  | ABB75543             | Group-IV *   |
| Polaromonas sp. JS666                              | Proteobacteria (Betaproteobacteria)  | YP_548263            | Group-IV *   |
| Polaromonas naphthalenivorans CJ2                  | Proteobacteria (Betaproteobacteria)  | AANM01000000 AANM010 | Group-IV *   |
| Ralstonia eutropha H16                             | Proteobacteria (Betaproteobacteria)  | YP_725290            | Group-IV *   |
| Ralstonia eutropha JMP134                          | Proteobacteria (Betaproteobacteria)  | AAZ61946             | Group-IV *   |
| Cupriavidus metallidurans CH34                     | Proteobacteria (Betaproteobacteria)  | YP_582859            | Group-IV *   |
| Rhodoferrax ferrireducens T118                     | Proteobacteria (Betaproteobacteria)  | ABD69049             | Group-IV *   |
| Bordetella avium 197N                              | Proteobacteria (Betaproteobacteria)  | YP_785754            | Group-V *    |
| Bordetella bronchiseptica RB50                     | Proteobacteria (Betaproteobacteria)  | NP_890120            | Group-V *    |
| Bordetella parapertussis 12822                     | Proteobacteria (Betaproteobacteria)  | NP_885354            | Group-V *    |
| Bordetella pertussis T'hama I                      | Proteobacteria (Betaproteobacteria)  | NP_880453            | Group-V *    |
| Dechloromonas aromatica RCB                        | Proteobacteria (Betaproteobacteria)  | YP_286465            | Group-V *    |
| Methylibium petroleiphilum PM1                     | Proteobacteria (Betaproteobacteria)  | YP_001020220         | Group-V *    |
| Nitrosomonas europaea ATCC 19718                   | Proteobacteria (Betaproteobacteria)  | NP_840997            | Group-V *    |
| Nitrosomonas eutropha C91                          | Proteobacteria (Betaproteobacteria)  | ABI59650             | Group-V *    |
| Nitrospira multiformis ATCC 25196                  | Proteobacteria (Betaproteobacteria)  | ABB75542             | Group-V *    |
| Polaromonas sp. JS666                              | Proteobacteria (Betaproteobacteria)  | YP_548262            | Group-V *    |
| Polaromonas naphthalenivorans CJ2                  | Proteobacteria (Betaproteobacteria)  | AANM01000000 AANM010 | Group-V *    |
| Ralstonia eutropha H16                             | Proteobacteria (Betaproteobacteria)  | YP_725289            | Group-V *    |
| Ralstonia eutropha JMP134                          | Proteobacteria (Betaproteobacteria)  | AAZ61947             | Group-V *    |
| Cupriavidus metallidurans CH34                     | Proteobacteria (Betaproteobacteria)  | YP_582858            | Group-V *    |
| Rhodoferrax ferrireducens T118                     | Proteobacteria (Betaproteobacteria)  | ABD69048             | Group-V *    |
| Acinetobacter sp. ADP1                             | Proteobacteria (Gammaproteobacteria) | CAG68152             | Group-VI *   |
| Mycobacterium marinum M                            | Actinobacteria                       | YP_001850711         | Group-VI *   |
| Colwellia psychrerythraea 34H                      | Proteobacteria (Gammaproteobacteria) | YP_268601            | Group-VI *   |
| Francisella tularensis subsp. tularensis SCHU S4   | Proteobacteria (Gammaproteobacteria) | YP_170103            | Group-VI *   |
| Colwellia psychrerythraea 34H                      | Proteobacteria (Gammaproteobacteria) | YP_268602            | Group-VII *  |
| Francisella tularensis subsp. tularensis SCHU S4   | Proteobacteria (Gammaproteobacteria) | YP_170102            | Group-VII *  |
| Clostridium beijerinckii NCIMB 8052                | Firmicutes                           | ABR32581             | Group-VIII * |
| Clostridium botulinum A str. ATCC 3502             | Firmicutes                           | CAL81675             | Group-VIII * |
| Clostridium perfringens ATCC 13124                 | Firmicutes                           | YP_696891            | Group-VIII * |
| Clostridium perfringens str. 13                    | Firmicutes                           | NP_563129            | Group-VIII * |
| Clostridium perfringens SM101                      | Firmicutes                           | YP_699487            | Group-VIII * |
| Clostridium tetani E88                             | Firmicutes                           | NP_780989            | Group-VIII * |
| Clostridium thermocellum ATCC 27405                | Firmicutes                           | YP_001038599         | Group-VIII * |
| Desulfotobacterium hafniense DCB-2                 | Firmicutes                           | YP_002456590         | Group-VIII * |
| Syntrophomonas wolfei subsp. wolfei str. Goettinge | Firmicutes                           | ABI68658             | Group-VIII * |
| Thermoanaerobacter pseudethanolicus ATCC 33223     | Firmicutes                           | YP_001666236         | Group-VIII * |
| Thermoanaerobacter tengcongensis MB4               | Firmicutes                           | AAM25889             | Group-VIII * |
| Janibacter sp. HTCC2649                            | Actinobacteria                       | ZP_00995355          | Group-IX *   |
| Janibacter sp. HTCC2649                            | Actinobacteria                       | ZP_00995358          | Group-X *    |
| Bordetella parapertussis 12822                     | Proteobacteria (Betaproteobacteria)  | BPP3183              | Group-IV *   |
| Octadecabacter antarcticus 238                     | Proteobacteria (Alphaproteobacteria) | ZP_05067667          | Group-VI *   |
| Octadecabacter antarcticus 238                     | Proteobacteria (Alphaproteobacteria) | ZP_05064377          | Group-VII *  |
| Francisella novicida FTE                           | Proteobacteria (Gammaproteobacteria) | ZP_03057450          | Group-VI *   |
| Francisella novicida U112                          | Proteobacteria (Gammaproteobacteria) | YP_898752            | Group-VI *   |
| Francisella novicida GA99-3548                     | Proteobacteria (Gammaproteobacteria) | ZP_04990001          | Group-VI *   |
| Francisella tularensis subsp. tularensis WY96-3418 | Proteobacteria (Gammaproteobacteria) | YP_001122090         | Group-VI *   |
| Francisella novicida FTG                           | Proteobacteria (Gammaproteobacteria) | ZP_03247111          | Group-VI *   |
| Francisella tularensis subsp. tularensis MA00-2987 | Proteobacteria (Gammaproteobacteria) | ZP_03665784          | Group-VI *   |
| Francisella tularensis subsp. tularensis FSC198    | Proteobacteria (Gammaproteobacteria) | YP_667235            | Group-VI *   |
| Francisella tularensis subsp. tularensis FSC033    | Proteobacteria (Gammaproteobacteria) | ZP_04986699          | Group-VI *   |
| Francisella tularensis subsp. mediasiatica FSC147  | Proteobacteria (Gammaproteobacteria) | YP_001891929         | Group-VI *   |
| Francisella tularensis subsp. tularensis MA00-2987 | Proteobacteria (Gammaproteobacteria) | ZP_05247730          | Group-VI *   |
| Francisella novicida GA99-3549                     | Proteobacteria (Gammaproteobacteria) | ZP_04988557          | Group-VI *   |
| Francisella tularensis subsp. holarctica URFT1     | Proteobacteria (Gammaproteobacteria) | ZP_06558955          | Group-VI *   |
| Francisella tularensis subsp. holarctica FTNF002-0 | Proteobacteria (Gammaproteobacteria) | YP_001428312         | Group-VI *   |

|                                                    |                                      |              |              |
|----------------------------------------------------|--------------------------------------|--------------|--------------|
| Francisella tularensis subsp. holarctica OSU18     | Proteobacteria (Gammaproteobacteria) | YP_763387    | Group-VI *   |
| Francisella tularensis subsp. holarctica 257       | Proteobacteria (Gammaproteobacteria) | ZP_04983545  | Group-VI *   |
| Francisella tularensis subsp. holarctica LVS       | Proteobacteria (Gammaproteobacteria) | YP_513553    | Group-VI *   |
| Francisella tularensis subsp. holarctica FSC200    | Proteobacteria (Gammaproteobacteria) | ZP_02274705  | Group-VI *   |
| Francisella tularensis subsp. holarctica FSC022    | Proteobacteria (Gammaproteobacteria) | ZP_04985201  | Group-VI *   |
| Francisella philomiragia subsp. philomiragia ATCC  | Proteobacteria (Gammaproteobacteria) | ZP_04755870  | Group-VI *   |
| Francisella philomiragia subsp. philomiragia ATCC  | Proteobacteria (Gammaproteobacteria) | YP_001678220 | Group-VI *   |
| Francisella philomiragia subsp. philomiragia ATCC  | Proteobacteria (Gammaproteobacteria) | ZP_05249534  | Group-VI *   |
| Congregibacter litoralis KT71                      | Proteobacteria (Gammaproteobacteria) | ZP_01104810  | Group-VI *   |
| gamma proteobacterium NOR5-3                       | Proteobacteria (Gammaproteobacteria) | ZP_05125957  | Group-VI *   |
| Plesiocystis pacifica SIR-1                        | Proteobacteria (Deltaproteobacteria) | ZP_01912973  | Group-VI *   |
| Acinetobacter sp. ADP1                             | Proteobacteria (Gammaproteobacteria) | YP_045974    | Group-VI *   |
| Herpetosiphon aurantiacus ATCC 23779               | Chloroflexi                          | YP_001543393 | Group-VI *   |
| Deinococcus maricopensis DSM 21211                 | Deinococcus-Thermus                  | YP_004172426 | Group-XIX    |
| Deinococcus deserti VCD115                         | Deinococcus-Thermus                  | YP_002787896 | Group-XIX    |
| Nakamurella multipartita DSM 44233                 | Actinobacteria                       | YP_003204118 | Group-IX *   |
| Kribbella flavida DSM 17836                        | Actinobacteria                       | YP_003381562 | Group-IX *   |
| Deinococcus maricopensis DSM 21211                 | Deinococcus-Thermus                  | YP_004171029 | Group-XIX    |
| Dermacoccus sp. Ellin185                           | Actinobacteria                       | ZP_07705583  | Group-IX *   |
| Sphingobium chlorophenicum L-1                     | Proteobacteria (Alphaproteobacteria) | ZP_07576634  | Group-XIX    |
| Rhizobium leguminosarum bv. trifolii WSM1325       | Proteobacteria (Alphaproteobacteria) | YP_002979139 | Group-XIX    |
| Deinococcus deserti VCD115                         | Deinococcus-Thermus                  | YP_002787193 | Group-XIX    |
| Kytococcus sedentarius DSM 20547                   | Actinobacteria                       | YP_003149147 | Group-IX *   |
| Mesorhizobium ciceri biovar biserrulae WSM1271     | Proteobacteria (Alphaproteobacteria) | YP_004134272 | Group-XIX    |
| Microcystis aeruginosa NIES-843                    | Cyanobacteria                        | YP_001657760 | Group-I *    |
| Gloeobacter violaceus PCC 7421                     | Cyanobacteria                        | NP_927272    | Group-I *    |
| Thermosinus carboxydivorans Nor1                   | Firmicutes                           | ZP_01666685  | Group-VIII * |
| Synechococcus sp. JA-2-3B'a(2-13)                  | Cyanobacteria                        | YP_477153    | Group-I *    |
| Cyanothece sp. PCC 7822                            | Cyanobacteria                        | YP_003888052 | Group-I *    |
| Thermosediminibacter oceani DSM 16646              | Firmicutes                           | YP_003824462 | Group-VIII * |
| Flavobacteriales bacterium ALC-1                   | Bacteroidetes                        | ZP_02181016  | Group-XIII   |
| Flavobacteria bacterium BAL38                      | Bacteroidetes                        | ZP_01734516  | Group-XIII   |
| Cyanothece sp. ATCC 51142                          | Cyanobacteria                        | YP_001803653 | Group-I *    |
| Cyanothece sp. CCY0110                             | Cyanobacteria                        | ZP_01728704  | Group-I *    |
| Pedobacter sp. BAL39                               | Bacteroidetes                        | ZP_01883431  | Group-XIII   |
| Cyanothece sp. PCC 8801                            | Cyanobacteria                        | YP_002371193 | Group-I *    |
| Cyanothece sp. PCC 8802                            | Cyanobacteria                        | YP_003136756 | Group-I *    |
| Cyanothece sp. PCC 7424                            | Cyanobacteria                        | YP_002376197 | Group-I *    |
| Chryseobacterium gleum ATCC 35910                  | Bacteroidetes                        | ZP_07087614  | Group-XIII   |
| Flavobacterium psychrophilum JIP02/86              | Bacteroidetes                        | YP_001296010 | Group-XIII   |
| Flavobacteriaceae bacterium 3519-10                | Bacteroidetes                        | YP_003095875 | Group-XIII   |
| Nostoc sp. PCC 7120                                | Cyanobacteria                        | NP_487919    | Group-I *    |
| Kordia algicida OT-1                               | Bacteroidetes                        | ZP_02160983  | Group-XIII   |
| Thermoanaerobacter tengcongensis MB4               | Firmicutes                           | NP_624285    | Group-VIII * |
| Cyanothece sp. PCC 7425                            | Cyanobacteria                        | YP_002485516 | Group-I *    |
| Thermosynechococcus elongatus BP-1                 | Cyanobacteria                        | NP_682960    | Group-I *    |
| Mucilaginibacter paludis DSM 18603                 | Bacteroidetes                        | ZP_07750076  | Group-XIII   |
| Arthrospira maxima CS-328                          | Cyanobacteria                        | ZP_03273369  | Group-I *    |
| 'Nostoc azollae' 0708                              | Cyanobacteria                        | YP_003720623 | Group-I *    |
| Trichodesmium erythraeum IMS101                    | Cyanobacteria                        | YP_721690    | Group-I *    |
| Thermoanaerobacter italicus Ab9                    | Firmicutes                           | YP_003478146 | Group-VIII * |
| Thermoanaerobacterium xylanolyticum LX-11          | Firmicutes                           | ZP_08117403  | Group-VIII * |
| Thermoanaerobacter mathranii subsp. mathranii str. | Firmicutes                           | YP_003677944 | Group-VIII * |
| Thermoanaerobacter sp. X513                        | Firmicutes                           | YP_003905284 | Group-VIII * |
| Thermoanaerobacter sp. X514                        | Firmicutes                           | YP_001663993 | Group-VIII * |
| Thermoanaerobacter sp. X561                        | Firmicutes                           | ZP_07131098  | Group-VIII * |
| Arthrospira platensis str. Paraca                  | Cyanobacteria                        | ZP_06381780  | Group-I *    |
| Thermoanaerobacter brockii subsp. finni Ako-1      | Firmicutes                           | YP_004187209 | Group-VIII * |
| Thermoanaerobacter ethanolicus JW 200              | Firmicutes                           | ZP_08211938  | Group-VIII * |
| Thermincola potens JR                              | Firmicutes                           | YP_003638920 | Group-VIII * |
| Microcoleus chthonoplastes PCC 7420                | Cyanobacteria                        | ZP_05030078  | Group-I *    |
| Desulfonatronospira thiodismutans ASO3-1           | Proteobacteria (Deltaproteobacteria) | ZP_07015214  | Group-XIII   |
| Cylindrospermopsis raciborskii CS-505              | Cyanobacteria                        | ZP_06307508  | Group-I *    |
| Lynghya sp. PCC 8106                               | Cyanobacteria                        | ZP_01618966  | Group-I *    |
| Synechococcus sp. PCC 7335                         | Cyanobacteria                        | ZP_05035312  | Group-I *    |
| Thermoanaerobacterium thermosaccharolyticum DSM 57 | Firmicutes                           | YP_003853266 | Group-VIII * |
| Oscillatoria sp. PCC 6506                          | Cyanobacteria                        | ZP_07109007  | Group-I *    |
| Raphidiopsis brookii D9                            | Cyanobacteria                        | ZP_06304438  | Group-I *    |
| Carboxydibrachium pacificum DSM 12653              | Firmicutes                           | ZP_05092727  | Group-VIII * |
| Gramella forsetii KT0803                           | Bacteroidetes                        | YP_860789    | Group-XIII   |
| Thermoanaerobacter ethanolicus CCSD1               | Firmicutes                           | ZP_05492349  | Group-VIII * |
| Planctomyces maris DSM 8797                        | Planctomycetes                       | ZP_01851722  | Group-XI     |
| Alkaliphilus metalliredigens QYMF                  | Firmicutes                           | YP_001319094 | Group-VIII * |
| Acetivibrio cellulolyticus CD2                     | Firmicutes                           | ZP_07328672  | Group-VIII * |
| Alkaliphilus oremlandii OhLAs                      | Firmicutes                           | YP_001513638 | Group-VIII * |
| Nodularia spumigena CCY9414                        | Cyanobacteria                        | ZP_01631862  | Group-I *    |
| Dyadobacter fermentans DSM 18053                   | Bacteroidetes                        | YP_003084947 | -            |
| Thermoanaerobacter wiegellii Rt8.B1                | Firmicutes                           | ZP_07547010  | Group-VIII * |
| Spirosoma linguale DSM 74                          | Bacteroidetes                        | YP_003388938 | -            |
| Chromohalobacter salexigens DSM 3043               | Proteobacteria (Gammaproteobacteria) | YP_573169    | Group-XI     |
| Dethiobacter alkaliphilus AHT 1                    | Firmicutes                           | ZP_03734994  | Group-VIII * |
| Clostridium thermocellum JW20                      | Firmicutes                           | ZP_06249861  | Group-VIII * |
| Legionella longbeachae NSW150                      | Proteobacteria (Gammaproteobacteria) | YP_003455995 | Group-XII    |
| Legionella longbeachae D-4968                      | Proteobacteria (Gammaproteobacteria) | ZP_06187977  | Group-XII    |
| Syntrophobotulus glycolicus DSM 8271               | Firmicutes                           | YP_004264561 | Group-VIII * |

|                                                    |                                      |              |              |
|----------------------------------------------------|--------------------------------------|--------------|--------------|
| Desulfotobacterium hafniense Y51                   | Firmicutes                           | YP_516379    | Group-VIII * |
| Syntrophomonas wolfei subsp. wolfei str. Goettinge | Firmicutes                           | YP_754029    | Group-VIII * |
| Clostridium papyrosolvens DSM 2782                 | Firmicutes                           | ZP_08192769  | Group-VIII * |
| Clostridium cellulolyticum H10                     | Firmicutes                           | YP_002504500 | Group-VIII * |
| Janthinobacterium sp. Marselle                     | Proteobacteria (Betaproteobacteria)  | YP_001355246 | Group-V *    |
| Clostridium thermocellum DSM 2360                  | Firmicutes                           | ZP_05430613  | Group-VIII * |
| Natranaerobius thermophilus JW/NM-WN-LF            | Firmicutes                           | YP_001916242 | Group-VIII * |
| Planctomyces limnophilus DSM 3776                  | Planctomycetes                       | YP_003630693 | Group-V *    |
| Legionella drancourtii LLAP12                      | Proteobacteria (Gammaproteobacteria) | ZP_00108586  | Group-XII    |
| Clostridium carboxidivorans P7                     | Firmicutes                           | ZP_05392782  | Group-VIII * |
| Alicyclobacillus acidocaldarius subsp. acidocaldar | Firmicutes                           | YP_003183625 | Group-VIII * |
| Bacillus sp. SG-1                                  | Firmicutes                           | ZP_01861428  | Group-XVIII  |
| Flavobacteriaceae bacterium 3519-10                | Bacteroidetes                        | YP_003096691 | -            |
| Rhodoferax ferrireducens T118                      | Proteobacteria (Betaproteobacteria)  | YP_522579    | Group-V *    |
| Alicyclobacillus acidocaldarius LAA1               | Firmicutes                           | ZP_03494771  | Group-VIII * |
| Polynucleobacter necessarius subsp. asymbioticus Q | Proteobacteria (Betaproteobacteria)  | YP_001155452 | Group-V *    |
| Clostridium botulinum B1 str. Okra                 | Firmicutes                           | YP_001779747 | Group-VIII * |
| Nitrosomonas sp. AL212                             | Proteobacteria (Betaproteobacteria)  | YP_004293563 | Group-V *    |
| Clostridium botulinum F str. Langeland             | Firmicutes                           | YP_001389483 | Group-VIII * |
| Clostridium botulinum A3 str. Loch Maree           | Firmicutes                           | YP_001785449 | Group-VIII * |
| Acidovorax delafieldii 2AN                         | Proteobacteria (Betaproteobacteria)  | ZP_04761260  | Group-V *    |
| Ralstonia eutropha JMP134                          | Proteobacteria (Betaproteobacteria)  | YP_296791    | Group-V *    |
| Laribacter hongkongensis HLHK9                     | Proteobacteria (Betaproteobacteria)  | YP_002795963 | Group-V *    |
| Clostridium botulinum NCTC 2916                    | Firmicutes                           | ZP_02612116  | Group-VIII * |
| Clostridium sporogenes ATCC 15579                  | Firmicutes                           | ZP_02993762  | Group-VIII * |
| Clostridium botulinum A2 str. Kyoto                | Firmicutes                           | YP_002802434 | Group-VIII * |
| Clostridium botulinum Ba4 str. 657                 | Firmicutes                           | YP_002860990 | Group-VIII * |
| Clostridium botulinum Bf                           | Firmicutes                           | ZP_02616935  | Group-VIII * |
| Clostridium ljungdahlii DSM 13528                  | Firmicutes                           | YP_003778402 | Group-VIII * |
| Clostridium botulinum A str. ATCC 3502             | Firmicutes                           | YP_001252667 | Group-VIII * |
| Clostridium botulinum A str. Hall                  | Firmicutes                           | YP_001386079 | Group-VIII * |
| Clostridium botulinum A str. ATCC 19397            | Firmicutes                           | YP_001382527 | Group-VIII * |
| Candidatus Accumulibacter phosphatis clade IIA str | Proteobacteria (Betaproteobacteria)  | YP_003169066 | Group-V *    |
| Leptothrix cholodnii SP-6                          | Proteobacteria (Betaproteobacteria)  | YP_001793059 | Group-V *    |
| Gallionella capsiferiformans ES-2                  | Proteobacteria (Betaproteobacteria)  | YP_003847386 | Group-V *    |
| Variovorax paradoxus EPS                           | Proteobacteria (Betaproteobacteria)  | YP_004153456 | Group-V *    |
| Oxalobacteraceae bacterium IMCC9480                | Proteobacteria (Betaproteobacteria)  | ZP_08273977  | Group-V *    |
| Clostridium butyricum 5521                         | Firmicutes                           | ZP_02951534  | Group-VIII * |
| Clostridium butyricum E4 str. BoNT E BL5262        | Firmicutes                           | ZP_04526420  | Group-VIII * |
| Nitrosospora multiformis ATCC 25196                | Proteobacteria (Betaproteobacteria)  | YP_412934    | Group-V *    |
| Hermiimonas arsenicoxydans                         | Proteobacteria (Betaproteobacteria)  | YP_001101550 | Group-V *    |
| Variovorax paradoxus S110                          | Proteobacteria (Betaproteobacteria)  | YP_002942975 | Group-V *    |
| Methylotenera sp. 301                              | Proteobacteria (Betaproteobacteria)  | YP_003674411 | Group-V *    |
| Bacillus tusciae DSM 2912                          | Firmicutes                           | YP_003587985 | Group-VIII * |
| Delftia acidovorans SPH-1                          | Proteobacteria (Betaproteobacteria)  | YP_001566723 | Group-V *    |
| Nitrosomonas eutropha C91                          | Proteobacteria (Betaproteobacteria)  | YP_747615    | Group-V *    |
| Cupriavidus taiwanensis LMG 19424                  | Proteobacteria (Betaproteobacteria)  | YP_002004802 | Group-V *    |
| Herbaspirillum seropedicae SmR1                    | Proteobacteria (Betaproteobacteria)  | YP_003775577 | Group-V *    |
| Achromobacter piechaudii ATCC 43553                | Proteobacteria (Betaproteobacteria)  | ZP_06686558  | Group-V *    |
| Verminephrobacter eiseniae EF01-2                  | Proteobacteria (Betaproteobacteria)  | YP_999693    | Group-V *    |
| Planctomyces limnophilus DSM 3776                  | Planctomycetes                       | YP_003630694 | Group-IV *   |
| Acidovorax avenae subsp. avenae ATCC 19860         | Proteobacteria (Betaproteobacteria)  | YP_004236344 | Group-V *    |
| Ralstonia eutropha JMP134                          | Proteobacteria (Betaproteobacteria)  | YP_296790    | Group-IV *   |
| Clostridium perfringens D str. JGS1721             | Firmicutes                           | ZP_02954019  | Group-VIII * |
| Clostridium perfringens NCTC 8239                  | Firmicutes                           | ZP_02641467  | Group-VIII * |
| Clostridium perfringens C str. JGS1495             | Firmicutes                           | ZP_02865227  | Group-VIII * |
| Clostridium perfringens B str. ATCC 3626           | Firmicutes                           | ZP_02635767  | Group-VIII * |
| Clostridium perfringens E str. JGS1987             | Firmicutes                           | ZP_02631555  | Group-VIII * |
| Clostridium perfringens CPE str. F4969             | Firmicutes                           | ZP_02639308  | Group-VIII * |
| Cupriavidus taiwanensis LMG 19424                  | Proteobacteria (Betaproteobacteria)  | YP_002004803 | Group-IV *   |
| Achromobacter xylosoxidans A8                      | Proteobacteria (Betaproteobacteria)  | YP_003977730 | Group-V *    |
| Polaromonas naphthalenivorans CJ2                  | Proteobacteria (Betaproteobacteria)  | YP_981243    | Group-V *    |
| Clostridium kluveri DSM 555                        | Firmicutes                           | YP_001397081 | Group-VIII * |
| Clostridium kluveri NBRC 12016                     | Firmicutes                           | YP_002473754 | Group-VIII * |
| Acidovorax citrulli AAC00-1                        | Proteobacteria (Betaproteobacteria)  | YP_972298    | Group-V *    |
| Clostridium beijerinckii NCIMB 8052                | Firmicutes                           | YP_001307537 | Group-VIII * |
| Achromobacter piechaudii ATCC 43553                | Proteobacteria (Betaproteobacteria)  | ZP_06686559  | Group-IV *   |
| Limnobacter sp. MED105                             | Proteobacteria (Betaproteobacteria)  | ZP_01914658  | Group-V *    |
| Bordetella petrii DSM 12804                        | Proteobacteria (Betaproteobacteria)  | YP_001630469 | Group-IV *   |
| Alicyclophilus denitrificans K601                  | Proteobacteria (Betaproteobacteria)  | YP_004386669 | Group-V *    |
| Acidovorax ebreus TPSY                             | Proteobacteria (Betaproteobacteria)  | YP_002552115 | Group-V *    |
| Acidovorax sp. JS42                                | Proteobacteria (Betaproteobacteria)  | YP_984977    | Group-V *    |
| Comamonas testosteroni KF-1                        | Proteobacteria (Betaproteobacteria)  | ZP_03545227  | Group-V *    |
| Comamonas testosteroni CNB-2                       | Proteobacteria (Betaproteobacteria)  | YP_003276651 | Group-V *    |
| Comamonas testosteroni S44                         | Proteobacteria (Betaproteobacteria)  | ZP_07043003  | Group-V *    |
| Clostridium botulinum B str. Eklund 17B            | Firmicutes                           | YP_001884683 | Group-VIII * |
| Achromobacter xylosoxidans A8                      | Proteobacteria (Betaproteobacteria)  | YP_003977731 | Group-IV *   |
| Alicyclophilus denitrificans BC                    | Proteobacteria (Betaproteobacteria)  | YP_004125434 | Group-V *    |
| Clostridium botulinum E1 str. 'BoNT E Beluga'      | Firmicutes                           | ZP_04821422  | Group-VIII * |
| Ralstonia sp. 5_7_47FAA                            | Proteobacteria (Betaproteobacteria)  | ZP_07673817  | Group-V *    |
| Clostridium botulinum E3 str. Alaska E43           | Firmicutes                           | YP_001919870 | Group-VIII * |
| Ralstonia pickettii 12J                            | Proteobacteria (Betaproteobacteria)  | YP_001892501 | Group-V *    |
| Ralstonia pickettii 12D                            | Proteobacteria (Betaproteobacteria)  | YP_002984003 | Group-V *    |
| Bordetella petrii DSM 12804                        | Proteobacteria (Betaproteobacteria)  | YP_001630468 | Group-V *    |
| Clostridium sp. 7_2_43FAA                          | Firmicutes                           | ZP_05132374  | Group-VIII * |

|                                                    |                                      |               |             |
|----------------------------------------------------|--------------------------------------|---------------|-------------|
| Lyngbya sp. PCC 8106                               | Cyanobacteria                        | ZP_01622608   | Group-I *   |
| Ralstonia sp. 5_7_47FAA                            | Proteobacteria (Betaproteobacteria)  | ZP_07673818   | Group-IV *  |
| Ralstonia pickettii 12J                            | Proteobacteria (Betaproteobacteria)  | YP_001892500  | Group-IV *  |
| Ralstonia pickettii 12D                            | Proteobacteria (Betaproteobacteria)  | YP_002984002  | Group-IV *  |
| Herbaspirillum seropedicae SmR1                    | Proteobacteria (Betaproteobacteria)  | YP_003775578  | Group-IV *  |
| Methylotenera sp. 301                              | Proteobacteria (Betaproteobacteria)  | YP_003674412  | Group-IV *  |
| Gallionella capsiferiformans ES-2                  | Proteobacteria (Betaproteobacteria)  | YP_003847387  | Group-IV *  |
| Bacillus sp. NRRL B-14911                          | Firmicutes                           | ZP_01172647   | Group-XVIII |
| Polynucleobacter necessarius subsp. asymbioticus Q | Proteobacteria (Betaproteobacteria)  | YP_001155453  | Group-IV *  |
| Candidatus Accumulibacter phosphatis clade IIA str | Proteobacteria (Betaproteobacteria)  | YP_003169067  | Group-IV *  |
| Nitrosomonas eutropha C91                          | Proteobacteria (Betaproteobacteria)  | YP_747614     | Group-IV *  |
| Hermiimonas arsenicoxydans                         | Proteobacteria (Betaproteobacteria)  | YP_001101549  | Group-IV *  |
| Nitrospira multiformis ATCC 25196                  | Proteobacteria (Betaproteobacteria)  | YP_412935     | Group-IV *  |
| Acidovorax avenae subsp. avenae ATCC 19860         | Proteobacteria (Betaproteobacteria)  | YP_004236343  | Group-IV *  |
| Laribacter hongkongensis HLHK9                     | Proteobacteria (Betaproteobacteria)  | YP_002795961  | Group-IV *  |
| Janthinobacterium sp. Marseille                    | Proteobacteria (Deltaproteobacteria) | YP_001355245  | Group-IV *  |
| Nitrosomonas sp. AL212                             | Proteobacteria (Betaproteobacteria)  | YP_004293564  | Group-IV *  |
| Acidovorax delafieldii 2AN                         | Proteobacteria (Betaproteobacteria)  | ZP_04761261   | Group-IV *  |
| Acidovorax citrulli AAC00-1                        | Proteobacteria (Betaproteobacteria)  | YP_972297     | Group-IV *  |
| delta proteobacterium MLMS-1                       | Proteobacteria (Deltaproteobacteria) | ZP_01291672   | Group-XVII  |
| Acidovorax ebreus TPSY                             | Proteobacteria (Betaproteobacteria)  | YP_002552116  | Group-IV *  |
| Delftia acidovorans SPH-1                          | Proteobacteria (Betaproteobacteria)  | YP_001566722  | Group-IV *  |
| delta proteobacterium MLMS-1                       | Proteobacteria (Deltaproteobacteria) | ZP_01288357   | Group-XVII  |
| Verminephrobacter eiseniae EF01-2                  | Proteobacteria (Betaproteobacteria)  | YP_999694     | Group-IV *  |
| Acidovorax sp. JS42                                | Proteobacteria (Betaproteobacteria)  | YP_984978     | Group-IV *  |
| Leptothrix cholodnii SP-6                          | Proteobacteria (Betaproteobacteria)  | YP_0011793058 | Group-IV *  |
| Comamonas testosteroni KF-1                        | Proteobacteria (Betaproteobacteria)  | ZP_03545226   | Group-IV *  |
| Comamonas testosteroni S44                         | Proteobacteria (Betaproteobacteria)  | ZP_07043004   | Group-IV *  |
| Comamonas testosteroni CNB-2                       | Proteobacteria (Betaproteobacteria)  | YP_003276652  | Group-IV *  |
| Rhodoferax ferrireducens T118                      | Proteobacteria (Betaproteobacteria)  | YP_522580     | Group-IV *  |
| Alicyclophilus denitrificans BC                    | Proteobacteria (Betaproteobacteria)  | YP_004125435  | Group-IV *  |
| Alicyclophilus denitrificans K601                  | Proteobacteria (Betaproteobacteria)  | YP_004386670  | Group-IV *  |
| Variovorax paradoxus EPS                           | Proteobacteria (Betaproteobacteria)  | YP_004153457  | Group-IV *  |
| Variovorax paradoxus S110                          | Proteobacteria (Betaproteobacteria)  | YP_002942976  | Group-IV *  |
| delta proteobacterium MLMS-1                       | Proteobacteria (Deltaproteobacteria) | ZP_01289304   | Group-XVII  |
| Oxalobacteraceae bacterium IMCC9480                | Proteobacteria (Betaproteobacteria)  | ZP_08273976   | Group-IV *  |
| Limnobacter sp. MED105                             | Proteobacteria (Betaproteobacteria)  | ZP_01914659   | Group-IV *  |
| Polaromonas naphthalenivorans CJ2                  | Proteobacteria (Betaproteobacteria)  | YP_981244     | Group-IV *  |
| Deinococcus deserti VCD115                         | Deinococcus-Thermus                  | YP_002787675  | Group-XIX   |
| Cyanothece sp. PCC 7822                            | Cyanobacteria                        | YP_003887952  | Group-II *  |
| Pelobacter propionicus DSM 2379                    | Proteobacteria (Deltaproteobacteria) | YP_901655     | Group-XVII  |
| Cyanothece sp. PCC 7424                            | Cyanobacteria                        | YP_002375941  | Group-II *  |
| Synechococcus sp. JA-2-3B'a(2-13)                  | Cyanobacteria                        | YP_479091     | Group-II *  |
| Oscillatoria sp. PCC 6506                          | Cyanobacteria                        | ZP_07109553   | Group-II *  |
| Cyanothece sp. CCY0110                             | Cyanobacteria                        | ZP_01731946   | Group-II *  |
| Thauera sp. MZ1T                                   | Proteobacteria (Betaproteobacteria)  | YP_002355630  | Group-XVI   |
| Nodularia spumigena CCY9414                        | Cyanobacteria                        | ZP_01628889   | Group-II *  |
| Cylindrospermopsis raciborskii CS-505              | Cyanobacteria                        | ZP_06308120   | Group-II *  |
| Chlorobium phaeobacteroides BS1                    | Chlorobi                             | YP_001960471  | Group-XVI   |
| Kribbella flavida DSM 17836                        | Actinobacteria                       | YP_003381566  | Group-X *   |
| Congregibacter litoralis KT71                      | Proteobacteria (Gammaproteobacteria) | ZP_01104809   | Group-VII * |
| Cyanothece sp. PCC 7425                            | Cyanobacteria                        | YP_002485117  | Group-II *  |
| gamma proteobacterium NOR5-3                       | Proteobacteria (Gammaproteobacteria) | ZP_05125958   | Group-VII * |
| Clostridium perfringens D str. JGS1721             | Firmicutes                           | ZP_02953772   | Group-XVIII |
| Clostridium perfringens B str. ATCC 3626           | Firmicutes                           | ZP_02636857   | Group-XVIII |
| Clostridium perfringens CPE str. F4969             | Firmicutes                           | ZP_02640360   | Group-XVIII |
| Clostridium perfringens ATCC 13124                 | Firmicutes                           | YP_697134     | Group-XVIII |
| Clostridium perfringens str. 13                    | Firmicutes                           | NP_563362     | Group-XVIII |
| Clostridium perfringens NCTC 8239                  | Firmicutes                           | ZP_02643564   | Group-XVIII |
| Clostridium perfringens E str. JGS1987             | Firmicutes                           | ZP_02632845   | Group-XVIII |
| Francisella novicida FTG                           | Proteobacteria (Gammaproteobacteria) | ZP_03247110   | Group-VII * |
| Clostridium perfringens C str. JGS1495             | Firmicutes                           | ZP_02865100   | Group-XVIII |
| Francisella tularensis subsp. tularensis FSC033    | Proteobacteria (Gammaproteobacteria) | ZP_04986698   | Group-VII * |
| Francisella tularensis subsp. tularensis FSC198    | Proteobacteria (Gammaproteobacteria) | YP_667234     | Group-VII * |
| Francisella novicida GA99-3548                     | Proteobacteria (Gammaproteobacteria) | ZP_04990000   | Group-VII * |
| Francisella novicida FTE                           | Proteobacteria (Gammaproteobacteria) | ZP_03057449   | Group-VII * |
| Francisella tularensis subsp. tularensis MA00-2987 | Proteobacteria (Gammaproteobacteria) | ZP_03665783   | Group-VII * |
| Francisella tularensis subsp. tularensis WY96-3418 | Proteobacteria (Gammaproteobacteria) | YP_001122089  | Group-VII * |
| Francisella novicida U112                          | Proteobacteria (Gammaproteobacteria) | YP_898751     | Group-VII * |
| Francisella tularensis subsp. tularensis MA00-2987 | Proteobacteria (Gammaproteobacteria) | ZP_05247729   | Group-VII * |
| Francisella novicida GA99-3549                     | Proteobacteria (Gammaproteobacteria) | ZP_04988556   | Group-VII * |
| Francisella tularensis subsp. holarctica URFT1     | Proteobacteria (Gammaproteobacteria) | ZP_06558954   | Group-VII * |
| Francisella tularensis subsp. holarctica FSC200    | Proteobacteria (Gammaproteobacteria) | ZP_02274704   | Group-VII * |
| Francisella tularensis subsp. holarctica FSC022    | Proteobacteria (Gammaproteobacteria) | ZP_04985202   | Group-VII * |
| Francisella tularensis subsp. holarctica 257       | Proteobacteria (Gammaproteobacteria) | ZP_04983546   | Group-VII * |
| Francisella tularensis subsp. holarctica LVS       | Proteobacteria (Gammaproteobacteria) | YP_513554     | Group-VII * |
| Francisella tularensis subsp. holarctica FTNF002-0 | Proteobacteria (Gammaproteobacteria) | YP_001428313  | Group-VII * |
| Francisella tularensis subsp. holarctica OSU18     | Proteobacteria (Gammaproteobacteria) | YP_763388     | Group-VII * |
| Francisella philomiragia subsp. philomiragia ATCC  | Proteobacteria (Gammaproteobacteria) | ZP_05249535   | Group-VII * |
| Francisella philomiragia subsp. philomiragia ATCC  | Proteobacteria (Gammaproteobacteria) | ZP_04755871   | Group-VII * |
| Francisella tularensis subsp. mediasiatica FSC147  | Proteobacteria (Gammaproteobacteria) | YP_001891928  | Group-VII * |
| Francisella philomiragia subsp. philomiragia ATCC  | Proteobacteria (Gammaproteobacteria) | YP_001678221  | Group-VII * |
| gamma proteobacterium HdN1                         | Proteobacteria (Gammaproteobacteria) | YP_003810425  | Group-XVI   |
| Herpetosiphon aurantiacus ATCC 23779               | Chloroflexi                          | YP_001546329  | Group-VII * |
| Nakamurella multipartita DSM 44233                 | Actinobacteria                       | YP_003204092  | Group-X *   |

|                                               |                                        |              |             |
|-----------------------------------------------|----------------------------------------|--------------|-------------|
| Chlorobium chlorochromatii CaD3               | Chlorobi                               | YP_379255    | -           |
| Campylobacteriales bacterium GD 1             | Proteobacteria (Epsilonproteobacteria) | ZP_05072003  | Group-XVI   |
| Caldicellulosiruptor lactoaceticus 6A         | Firmicutes                             | ZP_07737651  | Group-XIV   |
| Caldicellulosiruptor hydrothermalis 108       | Firmicutes                             | YP_003993205 | Group-XIV   |
| Caldicellulosiruptor saccharolyticus DSM 8903 | Firmicutes                             | YP_001179563 | Group-XIV   |
| Caldicellulosiruptor bescii DSM 6725          | Firmicutes                             | YP_002572426 | Group-XIV   |
| Caldicellulosiruptor kronotskyensis 2002      | Firmicutes                             | YP_004024768 | Group-XIV   |
| Chlorobium chlorochromatii CaD3               | Chlorobi                               | YP_379288    | Group-XVI   |
| Chlorobium chlorochromatii CaD3               | Chlorobi                               | YP_379253    | Group-XVI   |
| Thauera sp. MZ1T                              | Proteobacteria (Betaproteobacteria)    | YP_002355618 | Group-XVI   |
| Dethiobacter alkaliphilus AHT 1               | Firmicutes                             | ZP_03729796  | Group-III*  |
| Dermacoccus sp. Ellin185                      | Actinobacteria                         | ZP_07705573  | Group-X *   |
| Kytococcus sedentarius DSM 20547              | Actinobacteria                         | YP_003149146 | Group-X *   |
| Dethiobacter alkaliphilus AHT 1               | Firmicutes                             | ZP_03729795  | Group-III*  |
| Bacillus halodurans C-125                     | Firmicutes                             | NP_244520    | Group-III*  |
| Bacillus halodurans C-125                     | Firmicutes                             | NP_244522    | Group-III*  |
| Thauera sp. MZ1T                              | Proteobacteria (Betaproteobacteria)    | YP_002355619 | Group-XVI   |
| Plesiocystis pacifica SIR-1                   | Proteobacteria (Deltaproteobacteria)   | ZP_01912972  | Group-VII * |
| Oceanobacillus iheyensis HTE831               | Firmicutes                             | NP_693841    | Group-III*  |
| Bacillus halodurans C-125                     | Firmicutes                             | NP_244521    | Group-III*  |
| Oceanobacillus iheyensis HTE831               | Firmicutes                             | NP_693837    | Group-III*  |
| Caldicellulosiruptor kristjanssonii 177R1B    | Firmicutes                             | YP_004026883 | Group-XIV   |
| Oceanobacillus iheyensis HTE831               | Firmicutes                             | NP_693840    | Group-III*  |

Groups which were originally described by Fuser and Steinbuechel [1] are marked with an asterisk (\*)

#### Reference

1. Fuser G, Steinbuechel A (2007) Analysis of genome sequences for genes of cyanophycin metabolism: Identifying putative cyanophycin metabolizing prokaryotes. *Macromol Biosci* 7: 278-296.
