# Supplementary material for: Poles Apart: Arctic and Antarctic Octadecabacter strains Share High Genome Plasticity and a New Type of Xanthorhodopsin
Source: PubMed Central journal article supplement (PMC3646047; doi:10.1371/journal.pone.0063422), 2013-05-06
Supplement: pone.0063422.s011.pdf [file pone.0063422.s011.pdf]

**Table S3. List of metagenome projects used for the analyses of biogeography and diversity of microbial rhodopsins.**

| Name/Description                                                            | Source  | MG-RAST/CAMERA Accession   | Sequencing Method | Reference |
|-----------------------------------------------------------------------------|---------|----------------------------|-------------------|-----------|
| Antarctica aquatic microbial metagenome                                     | CAMERA  | CAM_PROJ_AntarcticaAquatic | 454/Sanger        | [1]       |
| Ward Hunt Ice Shelf melt pool metagenome                                    | MG-RAST | WHI                        | 454               | [2]       |
| Markham Ice Shelf melt pool metagenome                                      | MG-RAST | MIS                        | 454               | [2]       |
| Botany Bay metagenome                                                       | CAMERA  | CAM_PROJ_BotanyBay         | 454/Sanger        | [3]       |
| Global Ocean Sampling Expedition                                            | CAMERA  | CAM_PROJ_GOS               | 454/Sanger        | [4]       |
| Ice metagenome of the northern Schneeferner                                 | CAMERA  | CAM_PROJ_IceMetagenome     | 454               | [5]       |
| Marine bacterioplankton metagenomes                                         | CAMERA  | CAM_PROJ_Bacterioplankton  | 454               | [6]       |
| Marine metagenome from coastal waters project at Plymouth Marine Laboratory | CAMERA  | CAM_PROJ_PML               | 454               | [7]       |
| Metagenome from Yellowstone Bison Hot Spring                                | CAMERA  | CAM_PROJ_Bison             | 454               | [8]       |
| Metagenomic analysis of the North Atlantic spring bloom                     | CAMERA  | CAM_PROJ_BATS              | 454               | -         |
| Microbial community genomics at the HOT/ALOHA station                       | CAMERA  | CAM_PROJ_HOT               | Sanger            | [9]       |
| Monterey bay microbial study                                                | CAMERA  | CAM_PROJ_MontereyBay       | 454               | [10]      |
| Viral and microbial metagenomes from salterns of differing salinities       | CAMERA  | CAM_PROJ_SalternMetagenome | 454               | [11]      |
| Yellowstone Lake: Genetic and gene diversity in a freshwater lake           | CAMERA  | CAM_PROJ_YLAKE             | Sanger            | [12]      |

## References

1. Lauro F, DeMaere M, Yau S, Brown M, Ng C, et al. (2011) An integrative study of a meromictic lake ecosystem in Antarctica. *ISME J* 5: 879-895.
2. Varin T, Lovejoy C, Jungblut A, Vincent W, Corbeil J. (2010) Metagenomic profiling of Arctic microbial mat communities as nutrient scavenging and recycling systems. *Limnol Oceanogr* 55: 1901-1911.
3. Thomas T, Rusch D, DeMaere MZ, Yung PY, Lewis M, et al. (2010) Functional genomic signatures of sponge bacteria reveal unique and shared features of symbiosis. *ISME J* 4: 1557-1567.
4. Rusch D, Halpern A, Sutton G, Heidelberg K, Williamson S, et al. (2007) The Sorcerer II Global Ocean Sampling expedition: Northwest Atlantic through Eastern Tropical Pacific. *Plos Biology* 5: 398-431.
5. Simon C, Wiezer A, Strittmatter A, Daniel R. (2009) Phylogenetic Diversity and Metabolic Potential Revealed in a Glacier Ice Metagenome. *Appl Environ Microbiol* 75: 7519-7526.
6. Hewson I, Paerl RW, Tripp HJ, Zehr JP, Karl DM. (2009) Metagenomic potential of microbial assemblages in the surface waters of the central Pacific Ocean tracks variability in oceanic habitat. *Limnol Oceanogr* 54: 1981-1994.
7. Gilbert JA, Thomas S, Cooley NA, Kulakova A, Field D, et al. (2009) Potential for phosphonoacetate utilization by marine bacteria in temperate coastal waters. *Environ Microbiol* 11: 111-125.
8. Havig J, Raymond J, Meyer-Dombard D, Zolotova N, Shock E (2011) Merging isotopes and community genomics in a siliceous sinter-depositing hot spring. *J Geophys Res* 116: G01005.
9. Martinez A, Tyson GW, DeLong EF (2009) Widespread known and novel phosphonate utilization pathways in marine bacteria revealed by functional screening and metagenomic analyses. *Environ Microbiol* 12: 222-238.
10. Rich VI, Pham VD, Eppley J, Shi Y, DeLong EF (2011) Time-series analyses of Monterey Bay coastal microbial picoplankton using a 'genome proxy' microarray. *Environ Microbiol* 13: 116-134.
11. Dinsdale E, Edwards R, Hall D, Angly D, Breitbart M, et al. (2008) Functional metagenomic profiling of nine biomes. *Nature* 452: 629-632.
12. Kan J, Clingenpeel S, Macur R, Inskeep W, Lovatlo D, et al. (2011) Archaea in Yellowstone Lake. *ISME J* 5: 1784-1795.
