# Supplementary material for: Poles Apart: Arctic and Antarctic Octadecabacter strains Share High Genome Plasticity and a New Type of Xanthorhodopsin
Source: PubMed Central journal article supplement (PMC3646047; doi:10.1371/journal.pone.0063422), 2013-05-06
Supplement: pone.0063422.s012.pdf [file pone.0063422.s012.pdf]

**Table S4. Overview of selected features in regions of enhanced genome plasticity in the genomes of *Octadecabacter arcticus* (Oar-RGP1-17, pOAR118, pOAR160) and *Octadecabacter antarcticus* (Oan-RGP1-16, pOAN63).**

| Region    | Protein-coding genes | Hypothetical genes | Transposable elements | Notable features                                                                                                                                                                                                                                                            |
|-----------|----------------------|--------------------|-----------------------|-----------------------------------------------------------------------------------------------------------------------------------------------------------------------------------------------------------------------------------------------------------------------------|
| Oar-RGP1  | 12                   | 3                  | 9                     | -                                                                                                                                                                                                                                                                           |
| Oar-RGP2  | 55                   | 10                 | 11                    | CO-dehydrogenase-like gene cluster; metabolism of aromatic compounds; amino-acid metabolism                                                                                                                                                                                 |
| Oar-RGP3  | 29                   | 5                  | 17                    | Fragment of flagella gene cluster; fragment of Type IV secretion system                                                                                                                                                                                                     |
| Oar-RGP4  | 402                  | 98                 | 133                   | CO-dehydrogenase (OMP-type); fragment of gas vesicle gene cluster; thiamine metabolism; defect rhamnose uptake and utilization gene cluster; cyanase; diverse chaperons, unknown transport systems and various genes associated with carbohydrate and amino acid metabolism |
| Oar-RGP5  | 13                   | 4                  | 8                     | DNA-Methylase                                                                                                                                                                                                                                                               |
| Oar-RGP6  | 14                   | 1                  | 12                    | -                                                                                                                                                                                                                                                                           |
| Oar-RGP7  | 25                   | 5                  | 17                    | Restriction endonuclease; exonuclease                                                                                                                                                                                                                                       |
| Oar-RGP8  | 39                   | 7                  | 23                    | Ectoine uptake and utilization                                                                                                                                                                                                                                              |
| Oar-RGP9  | 54                   | 13                 | 15                    | UV-induced DNA repair system; putative secondary metabolism; sulfurtransferase; diverse genes associated with fatty acid, carbohydrate and amino acid metabolism                                                                                                            |
| Oar-RGP10 | 49                   | 14                 | 12                    | Glycine betaine transporter; nitrile hydratase; resolvase; diverse genes associated with carbohydrate and amino acid metabolism                                                                                                                                             |
| Oar-RGP11 | 97                   | 26                 | 32                    | Fragment of Type IV secretion system; topoisomerase; putative zinc transporter; UV-induced DNA repair system; diverse genes associated with carbohydrate and amino acid metabolism                                                                                          |
| Oar-RGP12 | 72                   | 23                 | 12                    | Thiamine metabolism; DNA-Helicase and exonuclease; riboflavin synthesis gene <i>ribH</i> ; diverse genes associated with carbohydrate, amino acid and energy metabolism                                                                                                     |
| Oar-RGP13 | 100                  | 20                 | 35                    | Putative heavy metal efflux transporters; RNA-polymerase sigma factor; diverse genes associated with carbohydrate; amino acid and energy metabolism                                                                                                                         |
| Oar-RGP14 | 72                   | 13                 | 26                    | Mercury resistance; polysaccharide-synthesis; toxin/antitoxin plasmid stabilisation system; choline/betaine metabolism; helicase and topoisomerase                                                                                                                          |
| Oar-RGP15 | 68                   | 22                 | 36                    | Toxin/antitoxin plasmid stabilisation system; putative fimbria synthesis                                                                                                                                                                                                    |
| Oar-RGP16 | 54                   | 4                  | 13                    | Multiple trimethylamine dehydrogenases; betaine/choline metabolism; diverse genes associated with amino acid and carbohydrate metabolism                                                                                                                                    |
| Oar-RGP17 | 29                   | 4                  | 21                    | Xanthorhodopsin                                                                                                                                                                                                                                                             |
| pOAR118   | 122                  | 51                 | 22                    | Flagella synthesis; toxin/antitoxin plasmid stabilisation system; two different replication initiation proteins                                                                                                                                                             |
| pOAR160   | 141                  | 22                 | 30                    | Gas vesicle synthesis; toxin/antitoxin plasmid stabilisation system                                                                                                                                                                                                         |
| Oan-RGP1  | 28                   | 12                 | 10                    | -                                                                                                                                                                                                                                                                           |
| Oan-RGP2  | 26                   | 10                 | 3                     | Spermidin/putrescine transporter; RNA polymerase sigma factor                                                                                                                                                                                                               |
| Oan-RGP3  | 68                   | 21                 | 5                     | CO-dehydrogenase (OMP-type); helicase; diverse genes associated with carbohydrate and nucleotide metabolism                                                                                                                                                                 |
| Oan-RGP4  | 17                   | 7                  | 3                     | Cyanate hydratase                                                                                                                                                                                                                                                           |
| Oan-RGP5  | 37                   | 19                 | 3                     | Peptide transporter; putative secondary metabolism                                                                                                                                                                                                                          |
| Oan-RGP6  | 84                   | 38                 | 17                    | DMT- and RND-type efflux transporters                                                                                                                                                                                                                                       |
| Oan-RGP7  | 20                   | 12                 | 2                     | -                                                                                                                                                                                                                                                                           |
| Oan-RGP8  | 296                  | 114                | 32                    | Rhamnose uptake and utilization; mercury resistance; DNA helicase, topoisomerase, recombinase, endonuclease and excisionase; cold shock protein; several defect UV-inducible DNA repair systems; diverse transporters of unknown function                                   |
| Oan-RGP9  | 176                  | 50                 | 42                    | Flagella synthesis; gas vesicle synthesis; diverse genes associated with carbohydrate and amino acid metabolism                                                                                                                                                             |
| Oan-RGP10 | 64                   | 27                 | 8                     | Mercury resistance (defect); glycine/betaine transporter; diverse genes associated with amino acid metabolism                                                                                                                                                               |
| Oan-RGP11 | 22                   | 13                 | 7                     | Resolvase                                                                                                                                                                                                                                                                   |
| Oan-RGP12 | 23                   | 4                  | 5                     | Hydantoin metabolism; diverse genes associated with amino acid and carbohydrate metabolism                                                                                                                                                                                  |
| Oan-RGP13 | 44                   | 14                 | 9                     | Sodium/hydrogen symporter; <i>toQ</i> + <i>toR</i> biopolymer transport proteins; sugar ABC transporter                                                                                                                                                                     |
| Oan-RGP14 | 10                   | 5                  | 3                     | -                                                                                                                                                                                                                                                                           |
| Oan-RGP15 | 37                   | 15                 | 1                     | UV-inducible DNA repair system; iron + heme uptake systems; recombinase/resolvase                                                                                                                                                                                           |
| Oan-RGP16 | 31                   | 10                 | 8                     | Xanthorhodopsin; DMT-type transporter; DNA helicase                                                                                                                                                                                                                         |
| pOAN63    | 57                   | 10                 | 5                     | Several transporters of unknown function, peptide transporters; toxin/antitoxin plasmid stabilisation system.                                                                                                                                                               |
